# Supplementary material for: Sensitivity and Concurrent validity of the Japanese Version of the Euthymia Scale: A Clinimetric Analysis
Source: Research Square preprint supplement (doi:10.21203/rs.3.rs-146117/v1), 2021-01-20
Supplement: Supplementary file 1 [file abe482a552d210dc82e93e54.docx]

**Table 1. Participants’ characteristics of online survey in Japan screened and mean scores of euthymia scale, psychological well-being (PWB) scale, resilience, life satisfaction, and social support by past major depressive episodes (MDE) measured by self-reported the Mini International Neuropsychiatric Interview (M.I.N.I.) (N = 1030).**

|  | History of MDE | |  |
| --- | --- | --- | --- |
|  | None (n=515) | Yes (n= 515) | p-value† |
|  | N (%) | N (%) |
| Sex male | 240 (46.6) | 248 (48.2) | 0.618 |
| Age mean (SD) [min - max] | 46.8 (13.5) [20 - 88] | 46.8 (13.5) [20 - 88] | <0.001** |
| 20 – 24 years old | 16 (3.1) | 18 (3.5) |  |
| 25 – 29 | 32 (6.2) | 50 (9.7) |  |
| 30 – 34 | 46 (8.9) | 62 (12.0) |  |
| 35 – 39 | 44 (8.5) | 60 (11.7) |  |
| 40 – 44 | 44 (8.5) | 61 (11.8) |  |
| 45 – 49 | 80 (15.5) | 90(17.5) |  |
| 50 – 54 | 80 (15.5) | 66 (12.8) |  |
| 1. – 59 | 49 (9.5) | 54 (10.5) |  |
| >60 | 124 (24.1) | 54 (10.5) |  |
| Married | 355 (68.9) | 293 (56.9) | <0.001** |
| Having a child/ children | 325 (63.1) | 270 (52.4) | 0.001** |
| Household income |  |  | 0.833 |
| <2 million yen | 31 (6.0) | 36 (7.0) |  |
| 2 -4 | 89 (17.3) | 83 (16.1) |  |
| 4 -6 | 116 (22.5) | 108 (21.0) |  |
| 6 -8 | 78 (15.1) | 75 (14.6) |  |
| 8 – 10 | 40 (7.8) | 53 (10.3) |  |
| 10< | 42 (8.2) | 40 (7.8) |  |
| unknown | 119 (23.1) | 120 (23.3) |  |
| Education status |  |  | 0.012* |
| Junior high school | 15 (2.9) | 11 (2.1) |  |
| High school | 173 (33.6) | 132 (25.6) |  |
| College | 126 (24.5) | 116 (22.5) |  |
| Undergraduate school | 187 (36.3) | 232 (45.0) |  |
| Upper than graduate school | 14 (2.7) | 23 |  |
| Unknown | -(-) | 1 (0.2) |  |
| Scale [range] | Mean (SD) | Mean (SD) |  |
| Euthymia scale [0 - 10] | 7.35 (2.54) | 4.57 (2.86) | <0.001** |
| PWB |  |  |  |
| Autonomy [7 - 49] | 29.86 (5.46) | 27.6 (6.45) | <0.001** |
| Environmental mastery [7 - 49] | 30.93 (5.01) | 26.0 (5.88) | <0.001** |
| Personal growth [7 - 49] | 31.43 (5.77) | 27.9 (6.88) | <0.001** |
| Positive relationships with others [7 - 49] | 31.43 (5.66) | 27.7 (6.97) | <0.001** |
| Purpose in life [7 - 49] | 30.02 (4.28) | 28.0 (4.94) | <0.001** |
| Self-acceptance [7 - 49] | 30.08 (5.70) | 24.9 (7.09) | <0.001** |
| Resilience [10 - 70] | 46.1 (9.22) | 38.9 (10.5) | <0.001** |
| Life satisfaction [5 - 35] | 20.6 (6.05) | 16.0 (6.85) | <0.001** |
| Social support [1 - 7] | 5.01 (1.27) | 4.26 (1.53) | <0.001** |

† Chi-test, variance analysis, or regression analysis was conducted to detect the difference between each group.

MDE: major depressive episode. SD: standard deviation.

** p<0.01, *<0.05

**Table 2. Pearson’s correlation coefficients between euthymia scale and other variables (N = 1030).**

| Variables | 2 | 3 | 4 | 5 | 6 | 7 | 8 | 9 | 10 | 11 | 12 |
| --- | --- | --- | --- | --- | --- | --- | --- | --- | --- | --- | --- |
| 1. Euthymia scale | .656** | .428** | .631** | .557** | .512** | .353** | .614** | .666** | .544** | .476** | -.595** |
| 1. Psychological well-being (all) |  | .658** | .866** | .859** | .816** | .670** | .884** | .638** | .657** | .623** | -.621** |
| 1. Autonomy |  |  | .563** | .450** | .322** | .270** | .519** | .457** | .302** | .171** | -.348** |
| 1. Environmental mastery |  |  |  | .659** | .665** | .470** | .749** | .591** | .578** | .518** | -.647** |
| 5. Personal growth |  |  |  |  | .666** | .599** | .700** | .519** | .508** | .525** | -.502** |
| 1. Positive relationships with others |  |  |  |  |  | .492** | .695** | .508** | .587** | .729** | -.492** |
| 1. Purpose in life |  |  |  |  |  |  | .490** | .291** | .401** | .420** | -.378** |
| 1. Self-acceptance |  |  |  |  |  |  |  | .632** | .717** | .576** | -.576** |
| 1. Resilience |  |  |  |  |  |  |  |  | .568** | .480** | -.488** |
| 1. Life satisfaction |  |  |  |  |  |  |  |  |  | .626** | -.449** |
| 1. Social support |  |  |  |  |  |  |  |  |  |  | -.426** |
| 1. Psychological distress |  |  |  |  |  |  |  |  |  |  |  |

** p<0.01

**Table 3. The mean score and standard deviation of each item of the Japanese version of the Euthymia scale stratified the categories by the history of MDE and current MDE (N = 1,030).**

|  | Mean (SD) | | | | | | Test for difference | |
| --- | --- | --- | --- | --- | --- | --- | --- | --- |
|  | Group | ０ | 1 | 2 | 3 | 4 |
| Item description | Total | Past (-)†  Current (-)‡ | Past (+)†  Current (-)‡ | Past (-)†  Current (±) ‡ | Past (+)†  Current (±) ‡ | Past (+)†  Current (+)‡ |
|  | N=1030 | N=500 | N=311 | N=15 | N=29 | N=175 | p-value§ | F value |
| 1. If I become sad, anxious or angry it is for a short time | 0.63 (0.5) | 0.79 (0.4) | 0.52 (0.5) | 0.67 (0.5) | 0.48 (0.5) | 0.39 (0.5) | <0.001 | 33.56 |
| 2. I do not keep thinking about negative experiences | 0.51 (0.5) | 0.68 (0.5) | 0.39 (0.5) | 0.53 (0.5) | 0.34 (0.5) | 0.26 (0.4) | <0.001 | 34.30 |
| 3. I am able to adapt to changing situations | 0.63 (0.5) | 0.78 (0.4) | 0.55 (0.5) | 0.80 (0.4) | 0.48 (0.5) | 0.34 (0.5) | <0.001 | 34.50 |
| 4. I try to be consistent in my attitudes and behaviors | 0.77 (0.4) | 0.78 (0.4) | 0.78 (0.4) | 0.73 (0.5) | 0.79 (0.4) | 0.73 (0.4) | 0.722 | 0.52 |
| 5. Most of the time I can handle stress | 0.55 (0.5) | 0.73 (0.4) | 0.46 (0.5) | 0.53 (0.5) | 0.52 (0.5) | 0.19 (0.4) | <0.001 | 51.28 |
| 6. I generally feel cheerful and in good spirits | 0.64 (0.5) | 0.81 (0.4) | 0.58 (0.5) | 0.73 (0.5) | 0.52 (0.5) | 0.28 (0.5) | <0.001 | 49.53 |
| 7. I generally feel calm and relaxed | 0.71 (0.5) | 0.85 (0.4) | 0.66 (0.5) | 0.87 (0.4) | 0.55 (0.5) | 0.39 (0.5) | <0.001 | 42.50 |
| 8. I generally feel active and vigorous | 0.51 (0.5) | 0.65 (0.5) | 0.47 (0.5) | 0.47 (0.5) | 0.41 (0.5) | 0.17 (0.4) | <0.001 | 35.47 |
| 9. My daily life is filled with things that interest me | 0.54 (0.5) | 0.64 (0.5) | 0.51 (0.5) | 0.53 (0.5) | 0.34 (0.5) | 0.32 (0.5) | <0.001 | 15.80 |
| 10. I wake up feeling fresh and rested | 0.48 (0.5) | 0.66 (0.5) | 0.39 (0.5) | 0.47 (0.5) | 0.28 (0.5) | 0.18 (0.4) | <0.001 | 42.97 |
| Total scores | 5.96 (3.04) | 7.38 (2.53) | 5.29 (2.79) | 6.33 (2.64) | 4.72 (2.85) | 3.26 (2.53) | <0.001 ※ | 89.90 |

§ p-value for ANOVA.

※<0.001** Group0 x Group1 <0.001** Group0 x Group3 <0.001** Group0 x Group4 <0.001** Group1 x Group4 <0.001** Group2 x Group4

Marginally p=0.054 Group3 x Group4

†Past (+): total scores≧5, Past (-): 0≦total scores≦4, measured by The Mini International Neuropsychiatric Interview (M.I.N.I.) questionnaire for lifetime episode.

‡Current(+): total scores≧5, Current (±): 1≦total score≦4, Current (-): score=0 by The Mini International Neuropsychiatric Interview (M.I.N.I.) questionnaire for current 2 weeks episode.

ES: euthymia scale. SD: standard deviation.

**Table 4. The mean score and standard deviation of each item of the Japanese version of the Euthymia scale stratified the categories by the history of MDE and psychological distress (N = 1,030).**

|  | Mean (SD) | | | | | | | Test for difference | |
| --- | --- | --- | --- | --- | --- | --- | --- | --- | --- |
|  | Group | ０ | 1 | 2 | 3 | 4 | 5 |
| Item description | Total | Past (-) † K6 (0-4) | Past (+) † K6 (0-4) | Past (-) † K6 (5-12) | Past (+) † K6 (5-12) | Past (-) † K6 (≧13) | Past (+) † K6 (≧13) |
|  | N=1030 | N=327 | N=90 | N=165 | N=222 | N=23 | N=203 | p-value§ | F value |
| 1. If I become sad, anxious or angry it is for a short time | 0.63 (0.5) | 0.83 (0.4) | 0.71 (0.5) | 0.73 (0.4) | 0.50 (0.5) | 0.61 (0.5) | 0.34 (0.5) | <0.001 | 36.83 |
| 2. I do not keep thinking about negative experiences | 0.51 (0.5) | 0.76 (0.4) | 0.53 (0.5) | 0.56 (0.5) | 0.39 (0.5) | 0.35 (0.5) | 0.20 (0.4) | <0.001 | 41.14 |
| 3. I am able to adapt to changing situations | 0.63 (0.5) | 0.83 (0.4) | 0.71 (0.5) | 0.71 (0.5) | 0.50 (0.5) | 0.52 (0.5) | 0.34 (0.5) | <0.001 | 36.37 |
| 4. I try to be consistent in my attitudes and behaviors | 0.77 (0.4) | 0.80 (0.4) | 0.87 (0.3) | 0.72 (0.4) | 0.79 (0.4) | 0.78 (0.4) | 0.69 (0.5) | 0.006 | 3.31 |
| 5. Most of the time I can handle stress | 0.55 (0.5) | 0.82 (0.4) | 0.61 (0.5) | 0.59 (0.5) | 0.42 (0.5) | 0.43 (0.5) | 0.20 (0.4) | <0.001 | 53.44 |
| 6. I generally feel cheerful and in good spirits | 0.64 (0.5) | 0.89 (0.3) | 0.73 (0.4) | 0.70 (0.5) | 0.55 (0.5) | 0.39 (0.5) | 0.29 (0.5) | <0.001 | 55.11 |
| 7. I generally feel calm and relaxed | 0.71 (0.5) | 0.92 (0.3) | 0.81 (0.4) | 0.77 (0.4) | 0.60 (0.5) | 0.48 (0.5) | 0.41 (0.5) | <0.001 | 45.39 |
| 8. I generally feel active and vigorous | 0.51 (0.5) | 0.75 (0.4) | 0.68 (0.5) | 0.49 (0.5) | 0.39 (0.5) | 0.35 (0.5) | 0.20 (0.4) | <0.001 | 43.51 |
| 9. My daily life is filled with things that interest me | 0.54 (0.5) | 0.71 (0.5) | 0.64 (0.5) | 0.53 (0.5) | 0.45 (0.5) | 0.35 (0.5) | 0.33 (0.5) | <0.001 | 19.59 |
| 10. I wake up feeling fresh and rested | 0.48 (0.5) | 0.77 (0.4) | 0.59 (0.5) | 0.49 (0.5) | 0.33 (0.5) | 0.30 (0.5) | 0.16 (0.4) | <0.001 | 55.32 |
| Total scores | 5.96 (3.04) | 8.08 (2.29) | 6.89 (2.52) | 6.30 (2.41) | 4.93 (2.59) | 4.57 (2.45) | 3.14 (2.48) | ※<0.001 | 116.22 |

§ P-value for ANOVA.

※Statistically significant differences were found.

<0.001** Group0 x Group2 <0.001** Group0 x Group3 <0.001** Group0 x Group4 <0.001** Group0 x Group5

<0.001** Group1 x Group3 <0.001** Group1 x Group5 <0.001** Group2 x Group3 <0.001** Group2 x Group5

<0.001** Group3 x Group5

P=0.001 Group0 x Group1 P=0.001 Group1 x Group4

P=0.021 Group2 x Group4

There was no significant difference between Group1-2, 3-4 and 4-5.

†Past (+): total scores≧5, Past (-): 0≦total scores≦4, measured by The Mini International Neuropsychiatric Interview (M.I.N.I.) questionnaire for lifetime episode.

ES: euthymia scale. SD: standard deviation.
